# Supplementary material for: Mesencephalic astrocyte-derived neurotropic factor is an important factor in chondrocyte ER homeostasis
Source: PubMed Central journal article supplement (PMC6363614; doi:10.1007/s12192-018-0953-7), 2018-12-12

**Mesencephalic astrocyte-derived neurotropic factor is an important factor in chondrocyte ER homeostasis.**

***Cell Stress and Chaperones***

Bell PA<sup>1#</sup>, Dennis EP<sup>1,2#</sup>, Hartley CL<sup>2\*</sup>, Jackson RM<sup>1</sup>, Porter A<sup>3</sup>, Treumann A<sup>3</sup>, Boot-Handford RP<sup>2</sup>, Pirog KA<sup>1\$</sup>, Briggs MD<sup>1,2</sup>.

<sup>1</sup> Institute of Genetic Medicine, Newcastle University, International Centre for Life, NE1 3BZ Newcastle Upon Tyne, UK

<sup>2</sup> Wellcome Trust Centre for Cell-Matrix Research, University of Manchester, Oxford Road, M13 9PT Manchester, UK

<sup>3</sup> Newcastle University Protein and Proteome Analysis Facility, Newcastle University, NE1 7RU Newcastle Upon Tyne, UK

# both authors contributed equally to this work

\* current affiliation: Genomic Diagnostics Laboratory, Manchester Centre for Genomic Medicine, Manchester University Hospitals NHS Foundation Trust, Manchester, M13 9WL

\$ corresponding author: [katarzyna.pirog@ncl.ac.uk](mailto:katarzyna.pirog@ncl.ac.uk) +44(0) 191 241 8816

**Figure 1. a)** Hematoxylin and eosin staining of cross sections of *Manf*<sup>+/+</sup> and *Manf*<sup>-/-</sup> lungs at E17.5, E18.5 and E19.5 showing a decrease in alveolar space across the ages. **b)** Quantification of the alveolar number, alveolar space per section and average alveolar space at E17.5, E18.5 and E19.5 (n=2). Key: \*\* P<0.01, \* P<0.05, # P~0.05 (approaching significance).

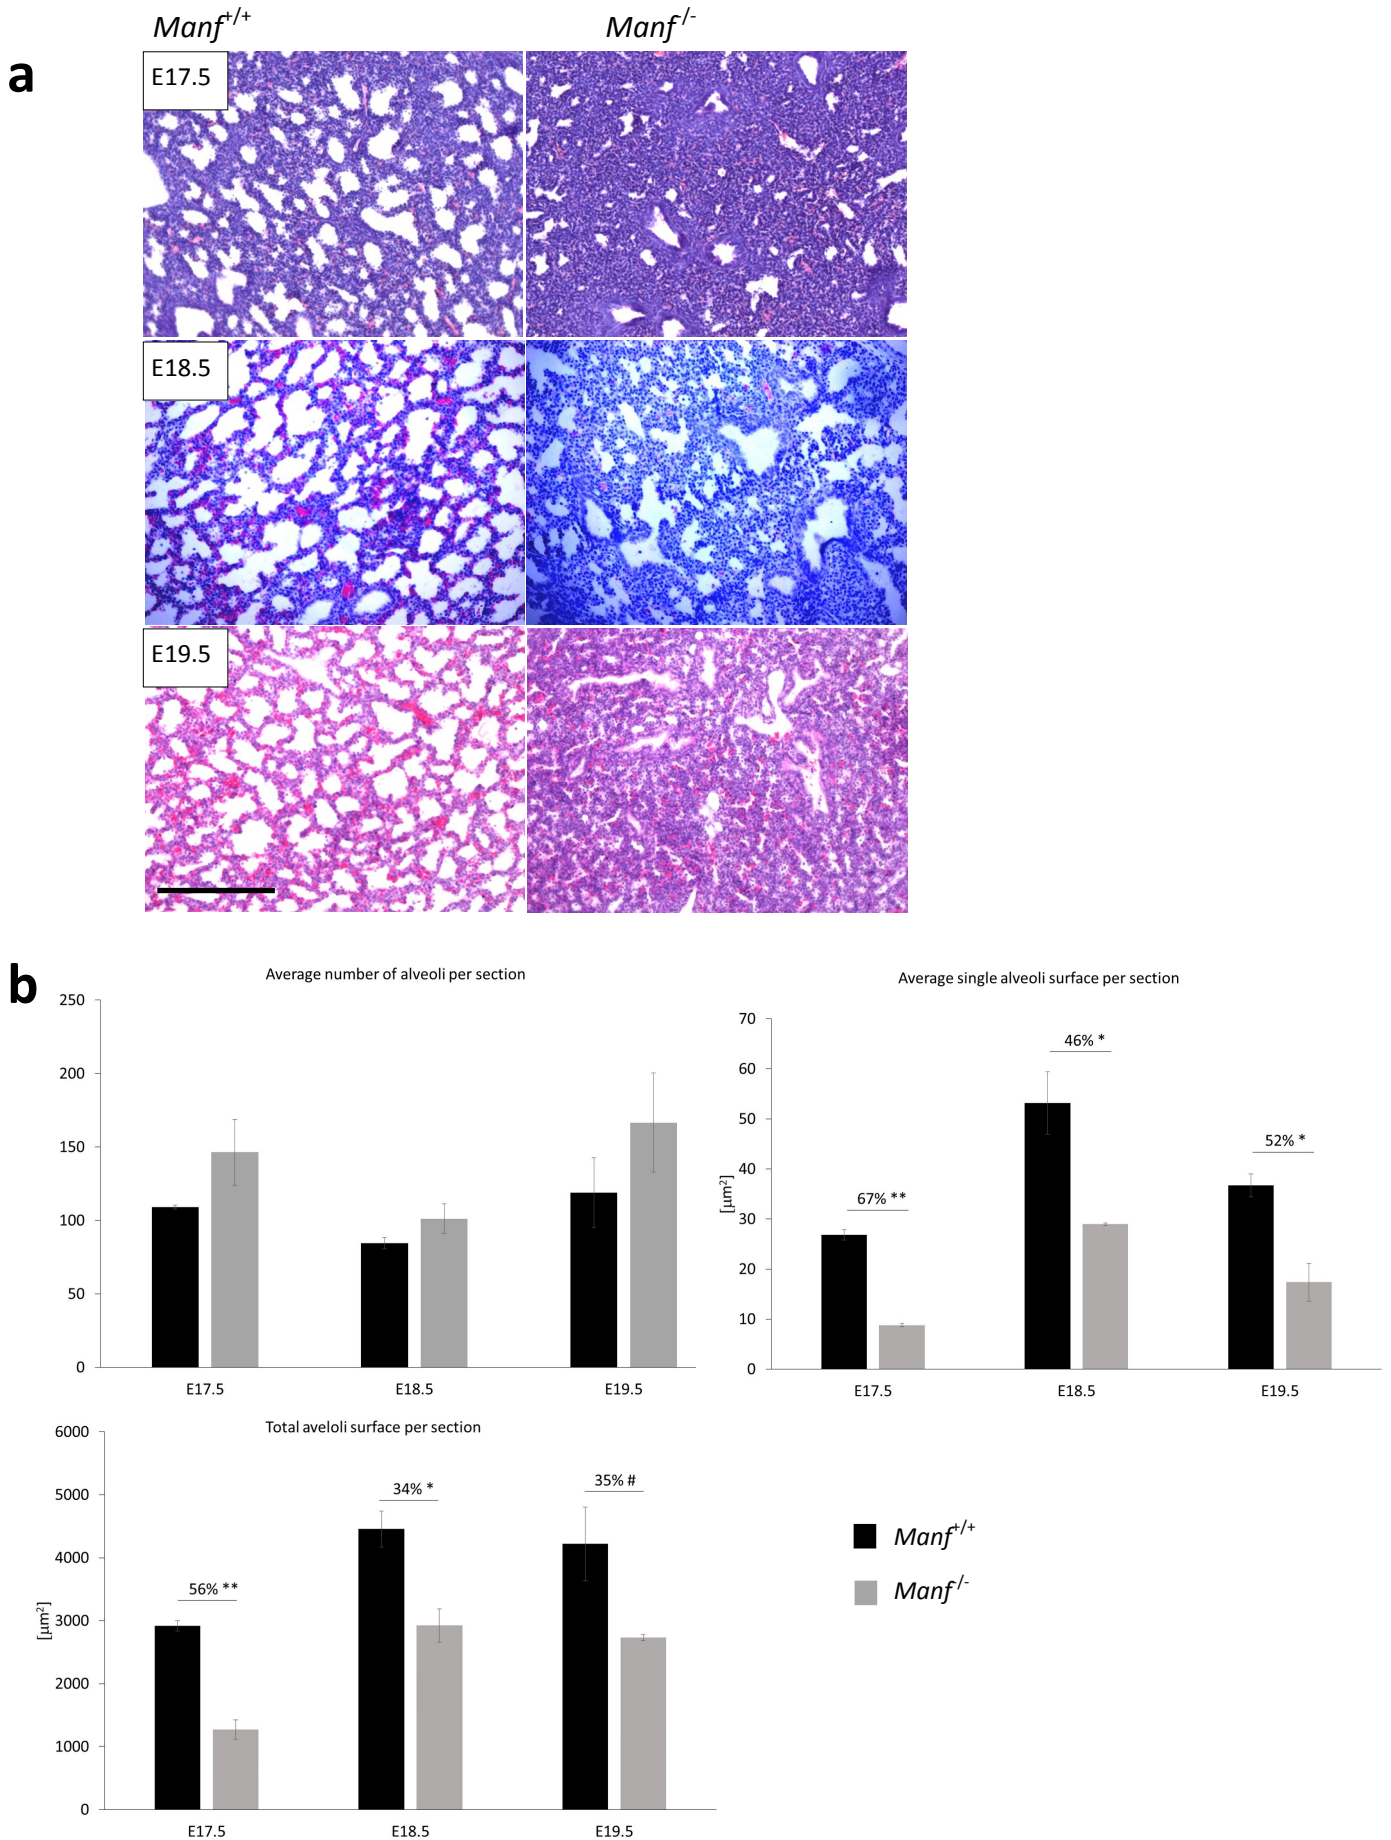

**Figure 2. a)** X-rays of *Manf*<sup>+/+</sup> and *Manf*<sup>-/-</sup> 50% C57BL6/J 50% 129Sv mice at 3 weeks showing the effect of global MANF deletion on long bone growth. **b)** Hematoxylin and eosin staining of cartilage growth plates from *Manf*<sup>+/+</sup> and *Manf*<sup>-/-</sup> 50% C57BL6/J 50% 129Sv mice at 3 weeks showing normal growth plate organisation in wild type and MANF null mice at 3 weeks. Key: scale bar = 200um.

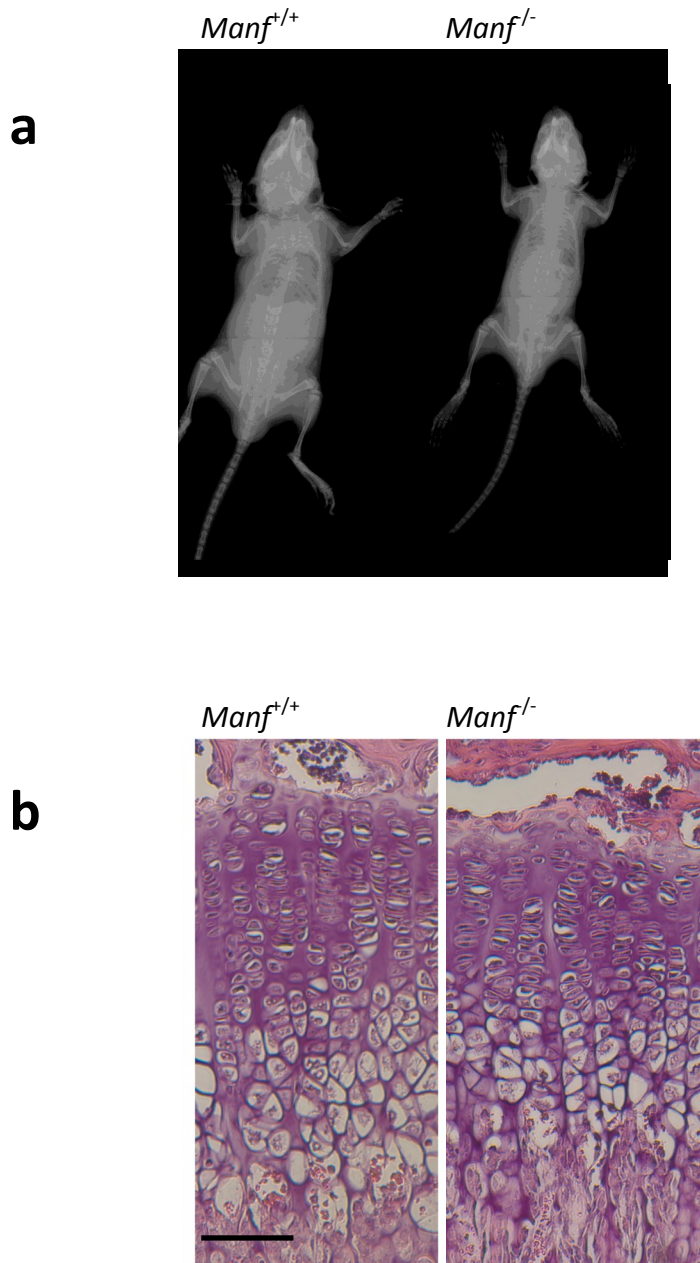

**Figure 3. a)** Loading control (total protein) for Figure 4b and c. **b)** Loading Loading control (total protein) for Figure 5b. **c)** Loading control for Figure 6 b and c.

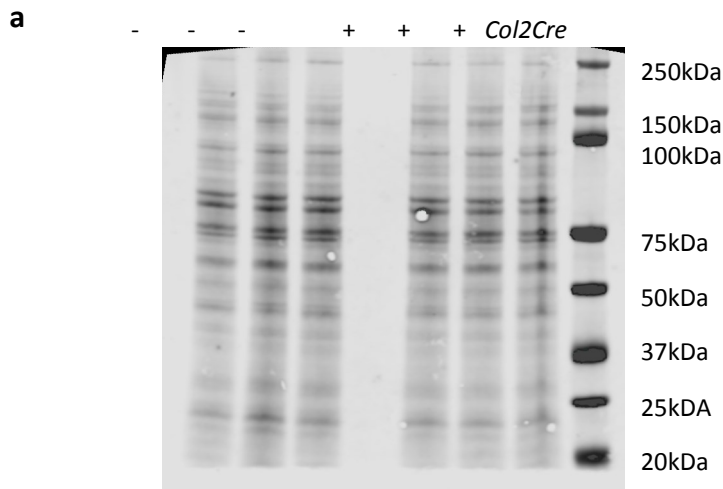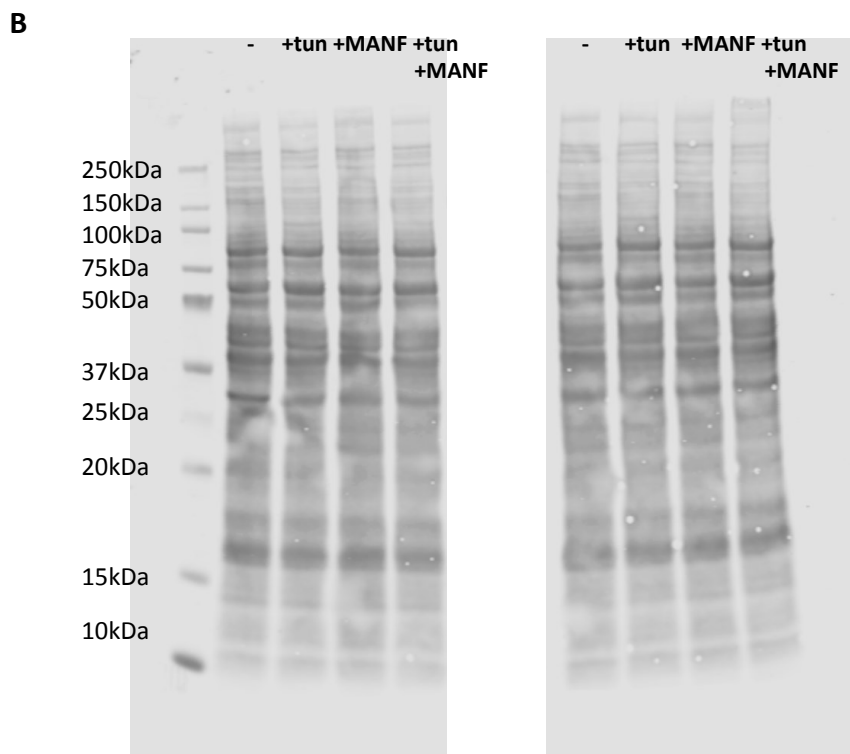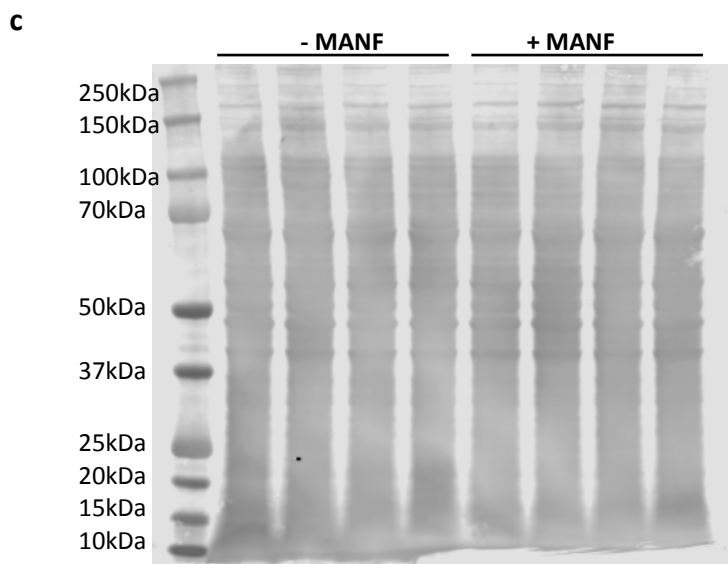

Supplement: 12192_2018_953_MOESM1_ESM.pdf [file 12192_2018_953_MOESM1_ESM.pdf]
