# Supplementary material for: Mesencephalic astrocyte-derived neurotropic factor is an important factor in chondrocyte ER homeostasis
Source: PubMed Central journal article supplement (PMC6363614; doi:10.1007/s12192-018-0953-7), 2018-12-12
Supplement: 12192_2018_953_MOESM2_ESM.pdf [file 12192_2018_953_MOESM2_ESM.pdf]

**Mesencephalic astrocyte-derived neurotropic factor is an important factor in chondrocyte ER homeostasis.**

***Cell Stress and Chaperones***

Bell PA<sup>1#</sup>, Dennis EP<sup>1,2#</sup>, Hartley CL<sup>2\*</sup>, Jackson RM<sup>1</sup>, Porter A<sup>3</sup>, Treumann A<sup>3</sup>, Boot-Handford RP<sup>2</sup>, Pirog KA<sup>1\$</sup>, Briggs MD<sup>1,2</sup>.

<sup>1</sup> Institute of Genetic Medicine, Newcastle University, International Centre for Life, NE1 3BZ Newcastle Upon Tyne, UK

<sup>2</sup> Wellcome Trust Centre for Cell-Matrix Research, University of Manchester, Oxford Road, M13 9PT Manchester, UK

<sup>3</sup> Newcastle University Protein and Proteome Analysis Facility, Newcastle University, NE1 7RU Newcastle Upon Tyne, UK

# both authors contributed equally to this work

\* current affiliation: Genomic Diagnostics Laboratory, Manchester Centre for Genomic Medicine, Manchester University Hospitals NHS Foundation Trust, Manchester, M13 9WL

\$ corresponding author: [katarzyna.pirog@ncl.ac.uk](mailto:katarzyna.pirog@ncl.ac.uk) +44(0) 191 241 8816

**Table 1** A list of all statistically significantly changed genes in the RNAseq analysis of *Manf<sup>fl/fl</sup> Col2Cre<sup>+</sup>* vs *Manf<sup>fl/fl</sup> Col2Cre<sup>-</sup>* cartilage at postnatal day 5. Fold changes in log2 scale. Significantly changed genes at 1.5-fold cut-off have been highlighted in bold.

| P5 UPREGULATED GENES |               |                         |             | P5 DOWNREGULATED GENES |                   |                         |             |
|----------------------|---------------|-------------------------|-------------|------------------------|-------------------|-------------------------|-------------|
| ID                   | gene name     | KOvsWT log2 Fold-Change | KOvsWT padj | ID                     | gene name         | KOvsWT log2 Fold-Change | KOvsWT padj |
| ENSMUSG00000027313   | <b>Chac1</b>  | 0.96684                 | 7.00E-16    | ENSMUSG00000103212     | AC13239<br>3.1    | -0.21312                | 0.020845    |
| ENSMUSG00000032715   | <b>Trib3</b>  | 0.69724                 | 6.63E-08    | ENSMUSG00000045573     | Penk              | -0.24892                | 0.044725    |
| ENSMUSG00000032115   | <b>Hyou1</b>  | 0.69158                 | 2.00E-18    | ENSMUSG00000041577     | Prelp             | -0.27017                | 0.025803    |
| ENSMUSG00000029752   | <b>Asns</b>   | 0.66058                 | 1.23E-12    | ENSMUSG00000034612     | Chst11            | -0.29682                | 0.003493    |
| ENSMUSG00000026864   | <b>Hspa5</b>  | 0.63051                 | 7.05E-16    | ENSMUSG00000003402     | Prkcsb            | -0.30336                | 0.010775    |
| ENSMUSG00000022769   | <b>Sdf2l1</b> | 0.60545                 | 1.55E-06    | ENSMUSG00000043587     | Pxylp1            | -0.33952                | 0.011419    |
| ENSMUSG00000078670   | Fam174b       | 0.51797                 | 0.000325    | ENSMUSG00000028211     | Trp53inp1         | -0.34019                | 0.038522    |
| ENSMUSG00000020571   | Pdia6         | 0.50429                 | 1.38E-12    | ENSMUSG00000002732     | Fkbp7             | -0.36643                | 0.002987    |
| ENSMUSG00000031232   | Magt1         | 0.50325                 | 3.66E-07    | ENSMUSG00000030077     | Chl1              | -0.37961                | 0.035862    |
| ENSMUSG00000030717   | Nupr1         | 0.49545                 | 3.66E-07    | ENSMUSG00000064246     | Chil1             | -0.38275                | 0.029398    |
| ENSMUSG00000020048   | Hsp90b1       | 0.49220                 | 1.62E-11    | ENSMUSG00000033036     | Gm7879            | -0.38920                | 1.34E-05    |
| ENSMUSG00000038539   | Atf5          | 0.46326                 | 5.90E-06    | ENSMUSG00000029016     | Cln6              | -0.39150                | 0.0073      |
| ENSMUSG00000014905   | Dnajb9        | 0.46205                 | 0.000468    | ENSMUSG00000030111     | A2m               | -0.39392                | 1.76E-07    |
| ENSMUSG00000023272   | Creld2        | 0.45976                 | 5.30E-07    | ENSMUSG00000039542     | Ncam1             | -0.39395                | 0.017751    |
| ENSMUSG00000035227   | Spcs2         | 0.45919                 | 6.16E-07    | ENSMUSG00000028619     | Tceanc2           | -0.40241                | 0.034292    |
| ENSMUSG00000025185   | Loxl4         | 0.45367                 | 0.001904    | ENSMUSG00000075318     | Scn2a1            | -0.41590                | 0.022361    |
| ENSMUSG00000054408   | Spcs3         | 0.43682                 | 5.30E-07    | ENSMUSG00000021185     | 9030617<br>O03Rik | -0.42418                | 0.018513    |
| ENSMUSG00000020368   | Canx          | 0.43036                 | 1.75E-07    | ENSMUSG00000002985     | ApoE              | -0.43188                | 0.000336    |
| ENSMUSG00000031490   | Eif4ebp1      | 0.42313                 | 0.000346    | ENSMUSG00000028532     | Cachd1            | -0.43628                | 0.004229    |
| ENSMUSG00000031297   | Slc7a3        | 0.42171                 | 0.010255    | ENSMUSG00000078719     | Msmg              | -0.44447                | 0.00105     |
| ENSMUSG00000006538   | lhh           | 0.41009                 | 0.025317    | ENSMUSG00000074968     | Ano3              | -0.44534                | 0.009304    |
| ENSMUSG00000015134   | Aldh1a3       | 0.40359                 | 0.033793    | ENSMUSG00000026173     | Plcd4             | -0.45800                | 0.006123    |
| ENSMUSG00000082697   | Gm12913       | 0.40117                 | 0.033793    | ENSMUSG00000028453     | Fancg             | -0.48859                | 0.001904    |
| ENSMUSG00000020873   | Slc35b1       | 0.40063                 | 0.000468    | ENSMUSG00000071650     | Ganab             | -0.53674                | 3.06E-13    |
| ENSMUSG00000028648   | Ndufs5        | 0.39699                 | 0.012446    | ENSMUSG00000081824     | BC002163          | -0.63268                | 2.54E-11    |
| ENSMUSG00000101188   | Eif4a-ps4     | 0.39253                 | 0.003791    | ENSMUSG00000032575     | <b>Manf</b>       | -0.78863                | 2.07E-14    |
